# Supplementary material
Source: PubMed Central journal article supplement (PMC3015119)
Supplement: supp_tpc.110.074641_Bar-Zvi_Supplemental_Data_final.pdf [file supp_tpc.110.074641_Bar-Zvi_Supplemental_Data_final.pdf]

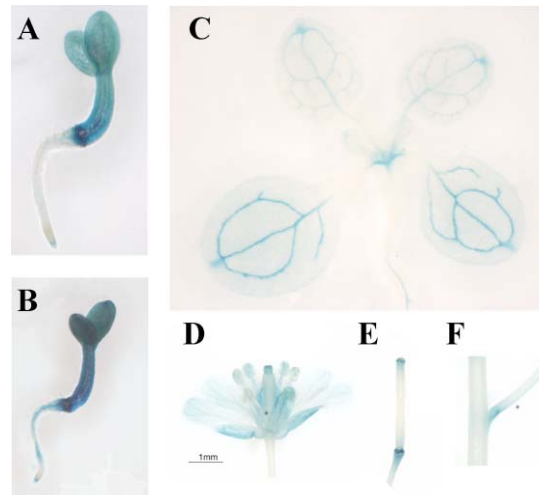

**Supplemental Figure 1.** GUS staining of *ABI4:GUS* plants. (A) Three-day-old seedlings germinating on 0.5x MS medium. (B) Three-day-old seedlings germinating on 0.5x MS medium supplemented with 7% glucose. (C) Rosette leaves of 2-week-old plant. (D) Open flower. (E) Silique. (F) Petiole base.

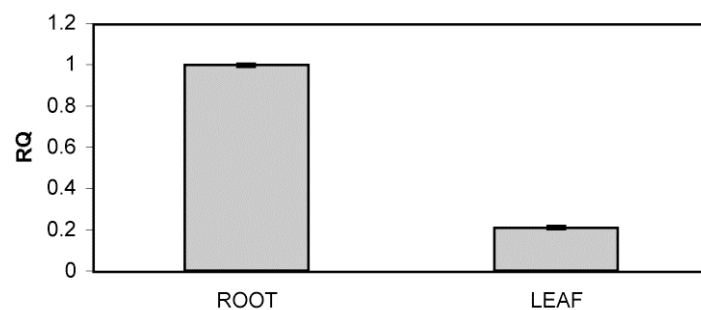

**Supplemental Figure 2.** *ABI4* overexpression in root and leaf tissues. RNA was extracted from two-week-old seedlings, and RNA levels were quantified using qRT-PCR, with the expression in the roots defined as 1.

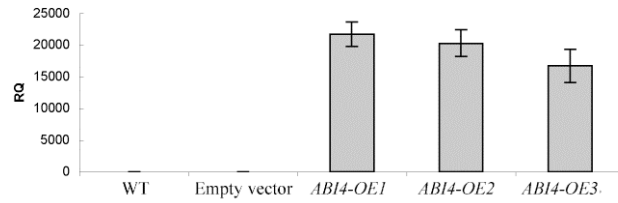

**Supplemental Figure 3.** Quantification of dexamethasone-induced *ABI4* overexpression in transgenic *Arabidopsis* plants harboring the *pOp6:ABI4* construct. Five-day-old seedlings were treated with 10  $\mu$ M dexamethasone. RNA was extracted 9 d later, and RNA levels were quantified using qRT-PCR, with the expression of wild-type plants defined as 1.

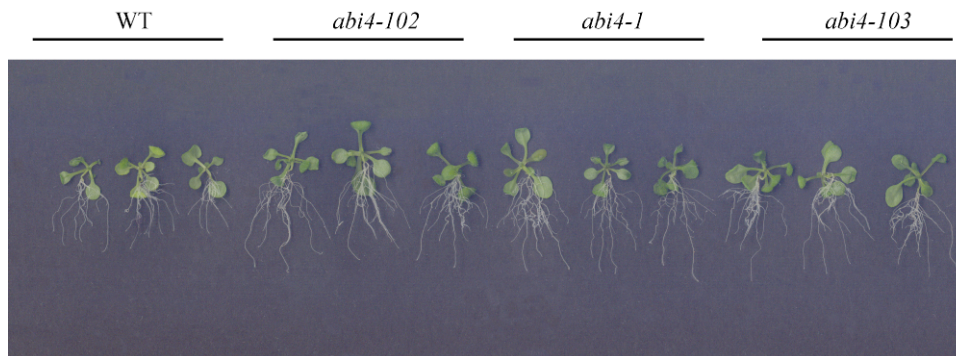

**Supplemental Figure 4.** Auxin treatment of *abi4* mutants. Wild-type and *abi4* mutants were germinated on solid 0.5x MS medium containing 2  $\mu$ M IAA. Plants were photographed 3 weeks later.

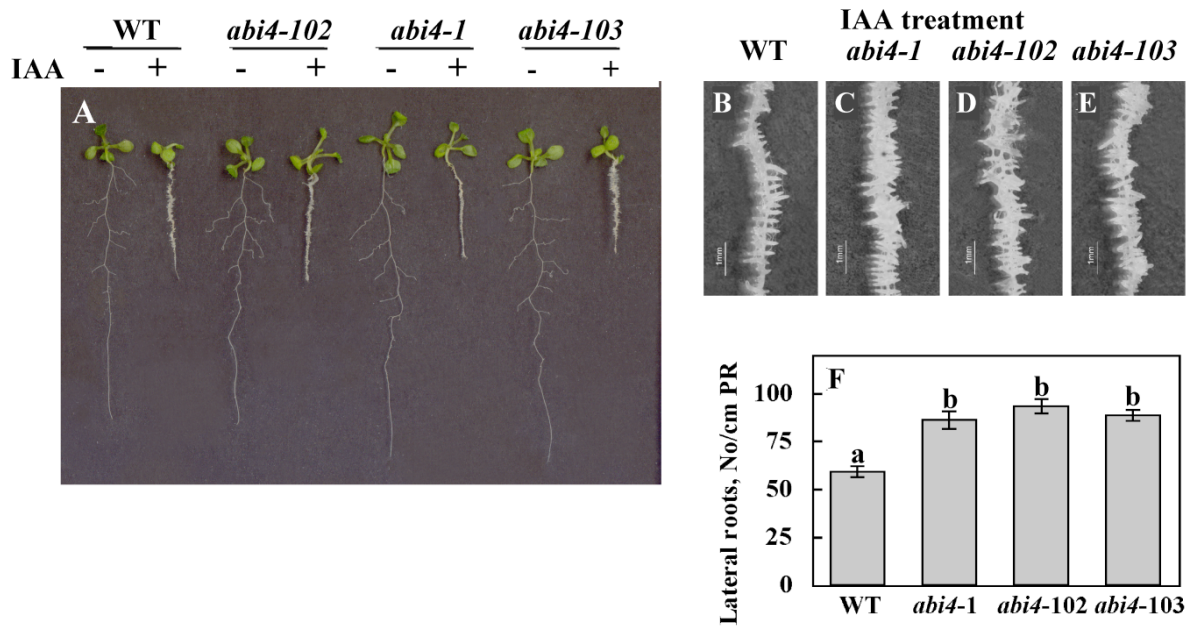

**Supplemental Figure 5.** Lateral root formation in IAA-treated *abi4* mutants. Seventeen-day-old seedlings were transferred to 0.5x MS medium or to 0.5x MS medium supplemented with 20  $\mu$ M IAA. Photograph was taken 4 d later. **(A)** Whole seedlings. **(B)** to **(E)** Close-up of roots of IAA-treated plants shown in **(A)**: **(B)** wild-type, **(C)** *abi4-1* mutant, **(D)** *abi4-102* mutant, **(E)** *abi4-103* mutant. **(F)** Quantitative analysis of the entire root system of IAA-treated seedlings such as those shown in **(B)** to **(E)**. Bars with different letters represent statistically different values by Tukey's HSD post-hoc test ( $P \leq 0.05$ ).

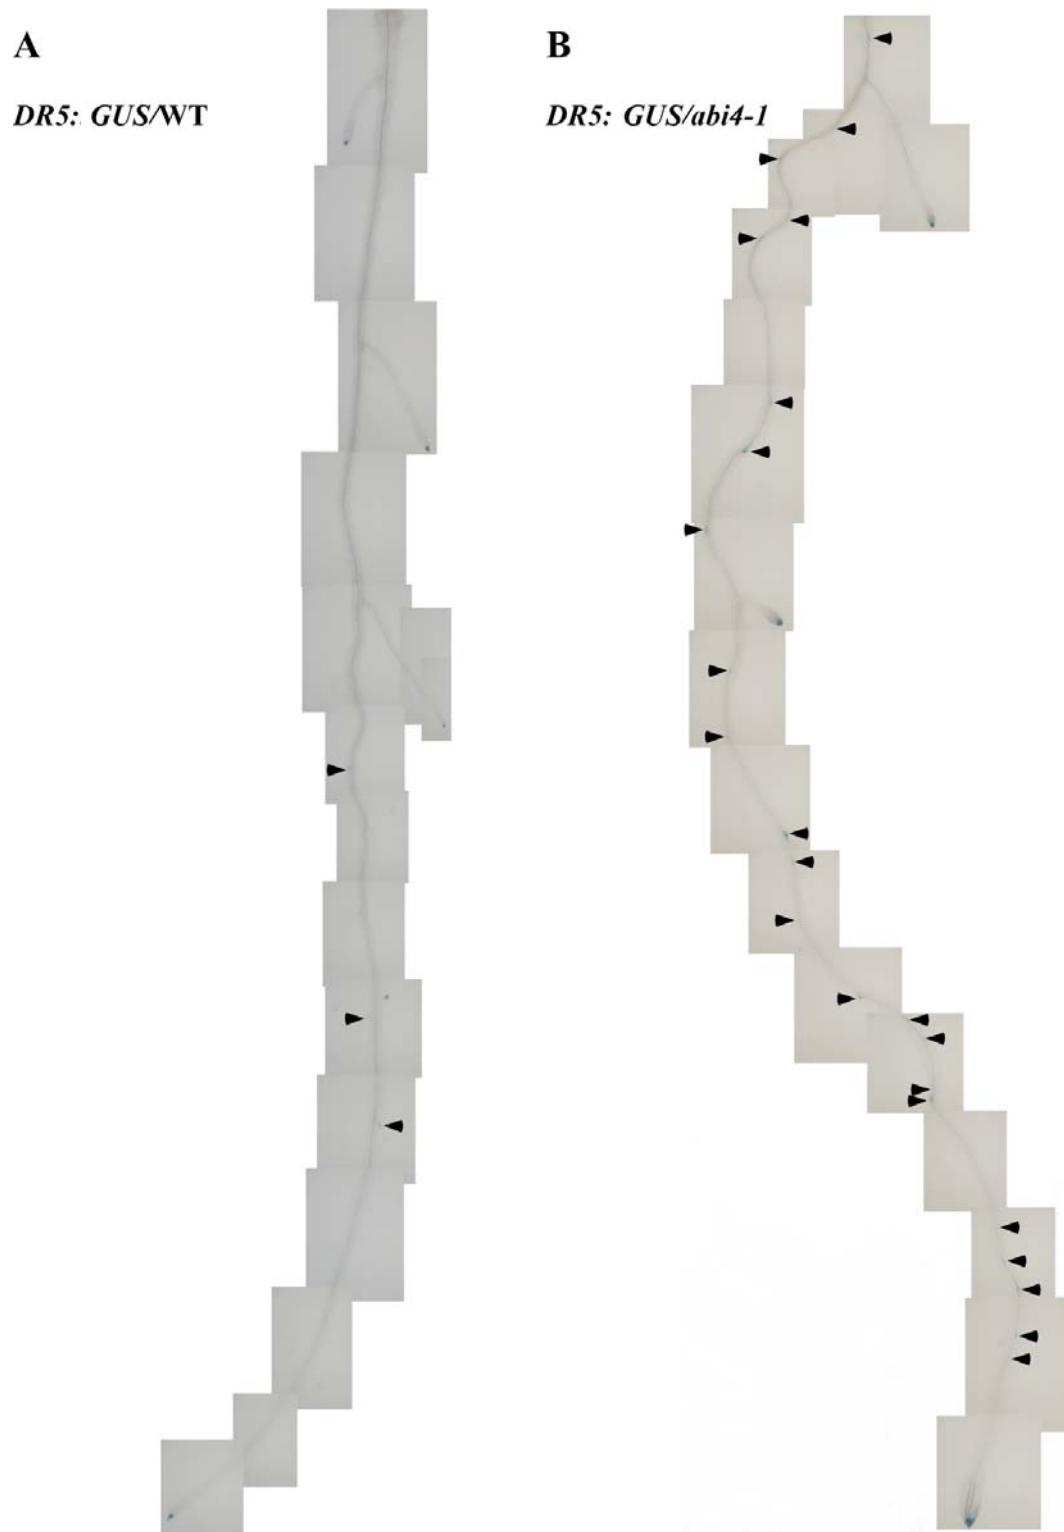

**Supplemental Figure 6.** *DR5:GUS* expression pattern is altered on the background of *abi4* mutation.

**(A)** GUS staining of *DR5:GUS*/wild type root system of 12-day-old seedling.

**(B)** GUS staining of homozygous *DR5:GUS/abi4-1* mutants 12-day-old seedlings.

Arrowheads indicate GUS staining foci.

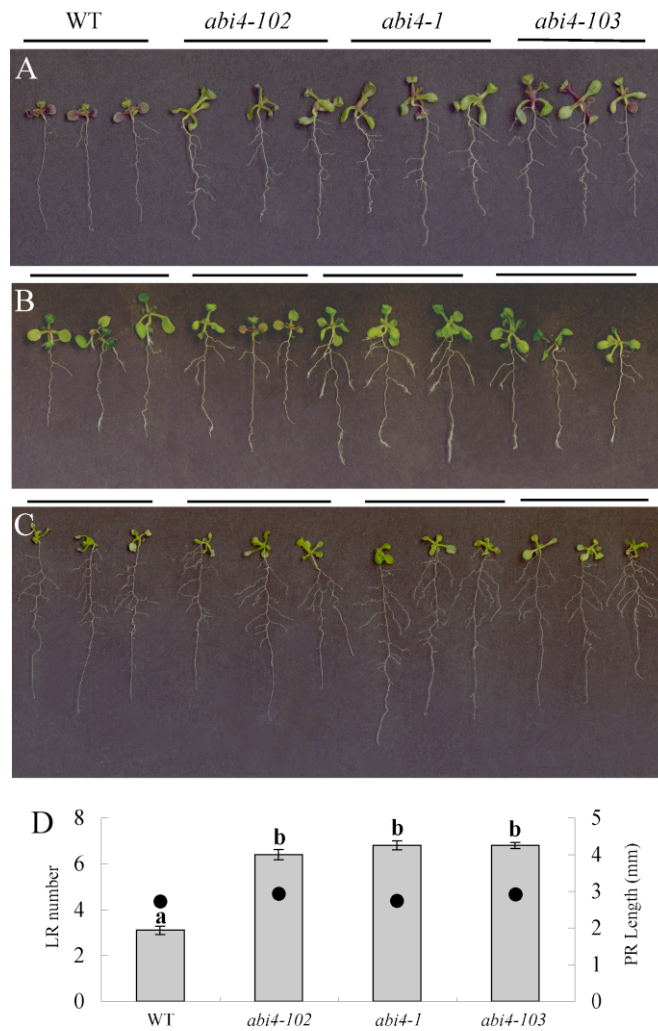

**Supplemental Figure 7.** Lateral root formation in cytokinin-treated wild-type and *abi4*-mutant *Arabidopsis*.

(A) to (C) One-week-old seedlings were transferred to 0.5x MS medium (C) or to 0.5x MS medium supplemented with 20  $\mu$ M zeatin (A) or 20  $\mu$ M 6-benzylaminopurine (6-BA) (B). Photograph was taken 10 d later.

(D) Quantitative analysis of data shown in (A). Bars, LR number, Dots, length of primary roots. Bars with different letters represent statistically different values by Tukey's HSD post-hoc test ( $P \leq 0.05$ ).

**Supplemental Table 1.** Genes whose steady state mRNA levels are not altered in roots of *abi4* mutants and *ABI4*-OE plants. mRNA levels were determined by qRT-PCR. Expression levels between these analyzed plant lines differed from wild type by < 20%.

| Gene name    | Gene locus |
|--------------|------------|
| <i>AUX1</i>  | AT2G38120  |
| <i>EIN2</i>  | AT5G03280  |
| <i>ERA1</i>  | AT5G40280  |
| <i>IAA14</i> | AT4G14550  |
| <i>IAA19</i> | AT3G15540  |
| <i>IAA28</i> | AT5G25890  |
| <i>LRP1</i>  | AT5G12330  |
| <i>PIN1</i>  | AT1G73590  |
| <i>TIR1</i>  | AT3G62980  |

**Supplemental Table 2. Primer list**

| Primer                 | Sequence                         | Application                       |
|------------------------|----------------------------------|-----------------------------------|
| ABI4 FOR <i>Bam</i> HI | ATGGATCCATACGGTAGATTAGTCTTTCTAGG | <i>ABI4</i> promoter cloning      |
| ABI4 REV <i>Eco</i> RI | GCCTTAAGAGATGAAGAAGAAGAAGAAGA    | <i>ABI4</i> promoter cloning      |
| ABI4 FOR <i>Sal</i> I  | TAGTCGACATGGACCCTTTAGCTTC        | <i>ABI4</i> coding region cloning |
| ABI4 REV <i>Sal</i> I  | CAGTCGACTTAATAGAATCCCCCAAG       | <i>ABI4</i> coding region cloning |
| ABI4 FOR               | TTACCGTGGCGTTTCGACAA             | qRT-PCR                           |
| ABI4 REV               | GAGTGCGCTTACGTGGCTCT             | qRT-PCR                           |
| 18S FOR                | AAGCAAGCCTACGCTCTGGA             | qRT-PCR                           |
| 18S REV                | AGGCCAACACAATAGGATCGA            | qRT-PCR                           |
| AUX1 FOR               | TTGGCCTTGGAATGACCACT             | qRT-PCR                           |
| AUX1 REV               | ATGTTTCACACCTTCCGCCT             | qRT-PCR                           |
| EIN2 FOR               | TATGACAAGTGGACGTGCATGTT          | qRT-PCR                           |
| EIN2 REV               | GCAACTCCCACAACCATGGT             | qRT-PCR                           |
| ERA1 FOR               | ACACAGTGTGGCATTTCAGGC            | qRT-PCR                           |
| ERA1 REV               | TGCGTTCGATGAACTCGAG              | qRT-PCR                           |
| IAA14 FOR              | CCTTCTAAGCCTCCTGCTAAAGC          | qRT-PCR                           |
| IAA14 REV              | CCGCTCTTCTGATTAGCCATAAC          | qRT-PCR                           |
| IAA19 FOR              | CATCGGTGTGGCCTTGAAA              | qRT-PCR                           |
| IAA19 REV              | GCGAGCATCCAGTCTCCATC             | qRT-PCR                           |
| IAA28 FOR              | TCATTCCCTTCCAATAACAGGGTT         | qRT-PCR                           |
| IAA28 REV              | TGTGCCGTTAGGTTTCTCCG             | qRT-PCR                           |
| LRP1 FOR               | CAAGACGGAGGAGGGTCAAG             | qRT-PCR                           |
| LRP1 REV               | CGTCCTCCACTGCCGTTACT             | qRT-PCR                           |
| PIN1 FOR               | AACGACAACCAGTACGTGGAGA           | qRT-PCR                           |
| PIN1 REV               | GCTTATGTTGTTCCCACCGTC            | qRT-PCR                           |
| TIR1 FOR               | TGCAGGAATCTGAAAGAGCTTG           | qRT-PCR                           |
| TIR1 REV               | GGAAATGGCTAAGCCAGTGG             | qRT-PCR                           |
